# Supplementary material
Source: Research Square preprint supplement (doi:10.21203/rs.3.rs-10080933/v1)

# Supplementary Materials

**Warfare dilemma**

To test the features of the MTS, the following warfare dilemma was proposed:

*“Two countries, A and B, have been at war for years (you are not a citizen of either country). The war was initiated by the rulers of B, against the will of the civilian population. Recently, the military equilibrium has broken, and it is certain that A will win. The question is how, when, and at what cost.*

*Country A has two strategies available: attacking the opposing army with conventional weapons and bombing the civilian population. They could use one, the other, or a combination of both. Bombing would demoralize country B: The more civilians are killed, the sooner B will surrender, and the fewer soldiers will die—about half from both sides, all willing to fight. Conventional fighting will minimize civilian casualties but maximize lives lost (all soldiers).*

*How should country A end the war? What do you feel is morally right?”*

| **Table S1.** Scenarios of the war dilemma. All quantities are in millions of lives. | | | | |
| --- | --- | --- | --- | --- |
| **Scenario #** | **Soldiers at risk (S)** | **Soldiers saved for each civil. sacrificed (S / C)** | **Feasible set** | **Pareto inferior solutions** |
| 1 | 6.00 | 1.20 | (5,0) (4,1) (3,2) (2,3) (1,4) (0,6) | (0,0) (1,0) (2,0) (3,0) (4,0) (0,1) (1,1) (2,1) (3,1) (0,2) (1,2) (2,2) (0,3) (1,3) (0,4) (0,5) |
| 2 | 7.00 | 1.40 | (5,0) (4,1) (3,2) (2,4) (1,5) (0,7) | (0,0) (1,0) (2,0) (3,0) (4,0) (0,1) (1,1) (2,1) (3,1) (0,2) (1,2) (2,2) (0,3) (1,3) (2,3) (0,4) (1,4) (0,5) (0,6) |
| 3 | 7.00 | 7.00 | (1,0) (0,7) | (0,0) (0,1) (0,2) (0,3) (0,4) (0,5) (0,6) |
| 4 | 3.00 | 1.50 | (2,0) (1,1) (0,3) | (0,0) (1,0) (0,1) (0,2) |
| 5 | 5.00 | 2.50 | (2,0) (1,2) (0,5) | (0,0) (1,0) (0,1) (1,1) (0,2) (0,3) (0,4) |
| 6 | 6.00 | 2.00 | (3,0) (2,2) (1,4) (0,6) | (0,0) (1,0) (2,0) (0,1) (1,1) (2,1) (0,2) (1,2) (0,3) (1,3) (0,4) (0,5) |
| 7 | 7.00 | 1.17 | (6,0) (5,1) (4,2) (3,3) (2,4) (1,5) (0,7) | (0,0) (1,0) (2,0) (3,0) (4,0) (5,0) (0,1) (1,1) (2,1) (3,1) (4,1) (0,2) (1,2) (2,2) (3,2) (0,3) (1,3) (2,3) (0,4) (1,4) (0,5) (0,6) |
| 8 | 5.00 | 1.67 | (3,0) (2,1) (1,3) (0,5) | (0,0) (1,0) (2,0) (0,1) (1,1) (0,2) (1,2) (0,3) (0,4) |
| 9 | 2.00 | 2.00 | (1,0) (0,2) | (0,0) (0,1) |
| 10 | 6.00 | 6.00 | (1,0) (0,6) | (0,0) (0,1) (0,2) (0,3) (0,4) (0,5) |
| 11 | 7.00 | 2.33 | (3,0) (2,2) (1,4) (0,7) | (0,0) (1,0) (2,0) (0,1) (1,1) (2,1) (0,2) (1,2) (0,3) (1,3) (0,4) (0,5) (0,6) |
| 12 | 7.00 | 3.50 | (2,0) (1,3) (0,7) | (0,0) (1,0) (0,1) (1,1) (0,2) (1,2) (0,3) (0,4) (0,5) (0,6) |
| 13 | 5.00 | 2.00 | (2,0) (1,2) (0,4) | (0,0) (1,0) (0,1) (1,1) (0,2) (0,3) |
| 14 | 5.00 | 1.25 | (4,0) (3,1) (2,2) (1,3) (0,5) | (0,0) (1,0) (2,0) (3,0) (0,1) (1,1) (2,1) (0,2) (1,2) (0,3) (0,4) |
| 15 | 4.00 | 4.00 | (1,0) (0,4) | (0,0) (0,1) (0,2) (0,3) |
| 16 | 5.00 | 5.00 | (1,0) (0,5) | (0,0) (0,1) (0,2) (0,3) (0,4) |
| 17 | 3.00 | 3.00 | (1,0) (0,3) | (0,0) (0,1) (0,2) |
| 18 | 6.00 | 1.50 | (4,0) (3,1) (2,3) (1,4) (0,6) | (0,0) (1,0) (2,0) (3,0) (0,1) (1,1) (2,1) (0,2) (1,2) (2,2) (0,3) (1,3) (0,4) (0,5) |
| 19 | 6.00 | 3.00 | (2,0) (1,3) (0,6) | (0,0) (1,0) (0,1) (1,1) (0,2) (1,2) (0,3) (0,4) (0,5) |
| 20 | 7.00 | 1.75 | (4,0) (3,1) (2,3) (1,5) (0,7) | (0,0) (1,0) (2,0) (3,0) (0,1) (1,1) (2,1) (0,2) (1,2) (2,2) (0,3) (1,3) (0,4) (1,4) (0,5) (0,6) |
| 21 | 4.00 | 1.33 | (3,0) (2,1) (1,2) (0,4) | (0,0) (1,0) (2,0) (0,1) (1,1) (0,2) (0,3) |
| The feasible set is the set of all possible answer options with the first value being the number of sacrificed soldiers and the second value the number of sacrificed civilians. Pareto inferior solutions are outcomes in which a feasible alternative exists that improves at least one dimension without causing a loss in another. | | | | |

**Moral phenotypes**

Participants were classified as deontological when the deontological option was selected in every scenario, and as utilitarian when they selected the utilitarian option in every scenario. If participants alternated (i.e., “flip-flopped”) between deontological and utilitarian answers without selecting compromise options, they were classified as “flip-floppers”. Lastly, participants were classified as compromisers when they selected at least one compromise option

**Moral spectrum score**

Moral spectrum-scores were calculated by quantifying choice in between 0% and 100%, depending on its position on the response of the moral spectrum. The lowest-end response (i.e., the utilitarian option) was assigned 0%, while the highest-end response (i.e., the deontological option) was assigned 100%, with intermediate responses receiving proportionally scaled values based on the number of answer options in each scenario (see *Table S1*).

| **Table S2.** The calculation model for moral spectrum scores. | | | | | | | | | |
| --- | --- | --- | --- | --- | --- | --- | --- | --- | --- |
| **Scenario Number** | **Number of options** | **Compromise value** | **Choice_1** | **Choice_2** | **Choice_3** | **Choice_4** | **Choice_5** | **Choice_6** | **Choice_7** |
| 1 | 6 | 20% | 100% | 80% | 60% | 40% | 20% | 0% | - |
| 2 | 6 | 20% | 100% | 80% | 60% | 40% | 20% | 0% | - |
| 3 | 2 | - | 100% | 0% | - | - | - | - | - |
| 4 | 3 | 50% | 100% | 50% | 0% | - | - | - |  |
| 5 | 3 | 50% | 100% | 50% | 0% | - | - | - | - |
| 6 | 4 | 33.33% | 100% | 66.67% | 33.33% | 0% | - | - | - |
| 7 | 7 | 16.67% | 100% | 83.35% | 66.68% | 50.01% | 33.34% | 16.67% | 0% |
| 8 | 4 | 33.33% | 100% | 66.67% | 33.33% | 0% | - | - | - |
| 9 | 2 | - | 100% | 0% | - |  | - | - | - |
| 10 | 2 | - | 100% | 0% | - |  | - | - | - |
| 11 | 4 | 33.33% | 100% | 66.67% | 33.33% | 0% | - | - | - |
| 12 | 3 | 50% | 100% | 50% | 0% |  | - | - | - |
| 13 | 3 | 50% | 100% | 50% | 0% |  | - | - | - |
| 14 | 5 | 25% | 100% | 75% | 50% | 25% | 0% | - | - |
| 15 | 2 | - | 100% | 0% | - | - | - | - | - |
| 16 | 2 | - | 100% | 0% | - | - | - | - | - |
| 17 | 2 | - | 100% | 0% | - | - | - | - | - |
| 18 | 5 | 25% | 100% | 75% | 50% | 25% | 0% | - | - |
| 19 | 3 | 50% | 100% | 50% | 0% | - | - | - | - |
| 20 | 5 | 25% | 100% | 75% | 50% | 25% | 0% | - | - |
| 21 | 4 | 33.33% | 100% | 66.67% | 33.33% | 0% | - | - | - |

**Preference consistency score**

Preference consistency was calculated using GARP, as similarly implemented by Guzman et al (2022). Preference consistency follows rational choice theory, which assumes that if a subject prefers option x over option y in one scenario, this preference remains consistent across similar scenarios. A violation in consistency occurs when a subject faces a scenario and chooses an option that does not align with previously made choices, i.e. is below the feasibility constraints. Consistency score was calculated as 1 – GARP violation ratio.

**Moral rightness function**

Since each scenario had its own assigned moral weight, the choices within scenarios and its corresponding S / C values could be structured from most equal weight (S / C ≈ 1.167) to least equal weight (S / C = 7). Comparisons in rightness function were made between military and civilian subjects in all 21 scenarios. A logistic function was chosen to account for the expected plateauing effect at higher scenario values, where α represents the upper asymptote (maximum percentage of soldiers saved), β is the growth rate, and σ is the inflection point (the scenario value at which the response reaches 50% of its maximum). The model used was:

Several socio-demographic characteristics were taken of our military sample (see *Table S3*). Groups differed in weight.

| **Table S3.** Demographic characteristics of the study population. | | | | | |
| --- | --- | --- | --- | --- | --- |
| *Socio-demographic characteristics* | **plac/plac** | **YOH/plac** | **CORT/plac** | **YOH/CORT** |  |
| *n* = 24 | *n* = 25 | *n* = 26 | *n* = 25 | *p* values |
| **Age** - Mean (SD) | 35.42 (8.63) | 39.16 (11.49) | 39.77 (11.86) | 35.28 (9.06) | 0.417 |
| **Height** (in cm) - Mean (SD) | 179.83 (8.66) | 181.34 (6.50) | 180.98 (8.26) | 180.18 (8.14) | 0.689 |
| **Weight** (in kg) - Mean (SD) | 88.36 (14.85) | 86.20 (10.01) | 92.58 (13.09) | 81.01 (13.46) | **0.007**** |
| **BMI** - Mean (SD) | 27.32 (4.19) | 26.21 (2.70) | 28.29 (3.93) | 24.84 (2.93) | 0.064 |
| **Abdomen circumference** (in cm) - Mean (SD) | 86.75 (13.17) | 83.92 (9.49) | 86.62 (12.96) | 80.16 (7.63) | 0.189 |
| **Sex** - Frequency (%) |  |  |  |  | 0.156 |
| Male | 24 (100) | 24 (96) | 23 (88.5) | 21 (84) |  |
| Female | 0 (0) | 1 (4) | 3 (11.5) | 4 (16) |  |
| **Education** - Frequency (%) |  |  |  |  | 0.607 |
| ISCED 2 | 0 (0) | 0 (0) | 0 (0) | 3 (12) |  |
| ISCED 3 | 10 (41.7) | 7 (28) | 7 (26.9) | 6 (24) |  |
| ISCED 4 | 7 (29.2) | 10 (40) | 6 (23.1) | 1 (4) |  |
| ISCED 5 | 0 (0) | 0 (0) | 1 (3.8) | 1 (4) |  |
| ISCED 6 | 4 (16.7) | 5 (20) | 7 (26.9) | 10 (40) |  |
| ISCED 7 | 2 (8.3) | 3 (12) | 5 (19.2) | 4 (16) |  |
| ISCED 8 | 1 (4.2) | 0 (0) | 0 (0) | 0 (0) |  |
| **Operating branch military** - Frequency (%) |  |  |  |  | 0.435 |
| Army | 11 (45.8) | 20 (80) | 14 (53.8) | 13 (52) |  |
| Navy | 6 (25) | 1 (4) | 6 (23.1) | 5 (20) |  |
| Air Force | 4 (16.7) | 3 (12) | 4 (15.4) | 5 (20) |  |
| Military Police | 3 (12.5) | 1 (4) | 2 (7.7) | 2 (8) |  |
| **Current rank** - Frequency (%) |  |  |  |  | 0.478 |
| Enlisted | 3 (12.5) | 4 (16) | 1 (3.8) | 3 (12) |  |
| Non-commissioned officer | 14 (58.3) | 10 (40) | 13 (50) | 9 (36) |  |
| Commissioned officer | 7 (29.2) | 11 (44) | 12 (46.2) | 13 (52) |  |
| **# of deployments** - Mean (SD) | 4.25 (8.16) | 5.16 (5.82) | 4.12 (3.64) | 2.96 (2.85) | 0.355 |
| **Years since last deployment** - Mean (SD) | 6.24 (5.73) | 4.35 (4.26) | 6.07 (3.19) | 4.24 (4.05) | 0.204 |
| *: p-value <.05 | | | | | |
| **: p-value <.01 | | | | | |
| ***: p-value <.001 | | | | | |

Several questionnaires were taken before stress exposure to get some trait characteristics of our military sample. Groups differed in PID-5 psychoticism and BAS fun-seeking, however these differences did not affect statistical analyses (see *Table S4*). All questionnaire scores were in conventional ranges. Scores were found to not affect statistical models during model building, as likelihood tests did not support improvement for any outcome.

| **Table S4.** Data on the questionnaires (PID-5, BIS/BAS, PSS-14). | | | | | |
| --- | --- | --- | --- | --- | --- |
| *Questionnaires* | **plac/plac** | **YOH/plac** | **CORT/plac** | **YOH/CORT** |  |
| *n* = 24 | *n* = 25 | *n* = 26 | *n* = 25 | *p* values |
| **PID-5** – Mean (SD) | 0.70 (0.27) | 0.75 (0.32) | 0.52 (0.21) | 0.64 (0.30) | **0.021*** |
| Negative affect | 0.77 (0.42) | 0.82 (0.40) | 0.64 (0.38) | 0.89 (0.37) | 0.148 |
| Detachment | 0.73 (0.50) | 0.62 (0.60) | 0.66 (0.43) | 0.52 (0.57) | 0.583 |
| Antagonism | 0.64 (0.53) | 0.75 (0.56) | 0.49 (0.38) | 0.69 (0.55) | 0.311 |
| Disinhibition | 0.61 (0.56) | 0.86 (0.62) | 0.48 (0.35) | 0.64 (0.40) | 0.208 |
| Psychoticism | 0.77 (0.54) | 0.70 (0.51) | 0.30 (0.35) | 0.49 (0.44) | **0.002**** |
| **BAS** – Mean (SD) |  |  |  |  |  |
| Drive | 11.71 (2.16) | 12.48 (2.28) | 11.38 (1.77) | 11.88 (2.01) | 0.291 |
| Fun seeking | 11.04 (1.49) | 12.44 (1.78) | 11.08 (1.55) | 11.60 (1.38) | **0.006**** |
| Reward responsiveness | 17.42 (1.44) | 17.60 (2.18) | 16.92 (1.83) | 17.60 (1.44) | 0.468 |
| **BIS** – Mean (SD) | 18.25 (3.71) | 16.96 (4.29) | 17.85 (3.44) | 18.36 (4.16) | 0.581 |
| **PSS-14** – Mean (SD) | 15.92 (6.47) | 15.48 (6.84) | 14.96 (4.92) | 14.40 (5.82) | 0.833 |
| *: p-value <.05 | | | | | |
| **: p-value <.01 | | | | | |
| ***: p-value <.001 | | | | | |

Supplementary tables showing model building of the LMMs, GLMM, GLM, and LMs did not include model versions that were not supported in the model through likelihood tests (see *Table S4 – S8*).

| **Table S5.** All linear mixed models of stress outcomes. Each model added another predictor, affecting the AIC, BIC and Log Likelihood. Model comparisons done with log-likelihood tests: model 1 represents the baseline model, while X2 values reflect comparisons to preceding model. All models included 100 participants. | | | | | | | | | | |
| --- | --- | --- | --- | --- | --- | --- | --- | --- | --- | --- |
| **Outcome** | **Model** | **Fixed effects** | **Random effects** | **AIC** | **BIC** | **LogLik** | **ΔAIC** | **X2** | **df** | **p** |
| Alpha-amylase | 1 | Timepoint | Intercept participant | -118.02 | -94.07 | 65.01 | - | - | - | - |
|  | 2 | - | Slope timepoint | -136.27 | -104.34 | 76.13 | 18.25 | 22.3 | 2 | **0.000***** |
|  | 3 | YOH * CORT | - | -138.07 | -94.16 | 80.04 | 1.8 | 7.8 | 3 | 0.050 |
|  | 4 | Timepoint * YOH + Timepoint * CORT | - | -175.34 | -107.49 | 104.67 | 37.27 | 49.3 | 6 | **0.000***** |
|  | 5 | Age | - | -181.88 | -110.03 | 108.94 | 6.54 | 8.5 | 1 | **0.003**** |
| Cortisol | 1 | Timepoint | Intercept participant | 736.67 | 760.62 | -362.34 | - | - | - | - |
|  | 2 | - | Slope timepoint | 640.65 | 672.58 | -312.32 | 96.02 | 100 | 2 | **0.000***** |
|  | 3 | YOH * CORT | - | 598.81 | 642.72 | -288.40 |  | 47.84 | 3 | **0.000***** |
|  | 4 | Timepoint * YOH + Timepoint * CORT | - | 368.81 | 436.67 | -167.41 | 230 | 242 | 6 | **0.000***** |
| Pupil size | 1 | Timepoint | Intercept participant | 407.59 | 431.54 | -197.79 | - | - | - | - |
|  | 2 | - | Slope timepoint | 360.34 | 392.27 | -172.17 | 47.25 | 51.2 | 2 | **0.000***** |
|  | 3 | YOH * CORT | - | 364.29 | 408.20 | -171.15 | -3.95 | 2 | 3 | 0.563 |
|  | 4 | Timepoint * YOH + Timepoint * CORT | - | 333.44 | 401.3 | -149.72 | 30.85 | 42.9 | 6 | **0.000***** |
|  | 5 | Age | - | 325.62 | 397.47 | -144.81 | 7.82 | 9.8 | 1 | **0.002**** |
|  | 6 | Age * CORT | - | 322.80 | 398.64 | -142.40 | 2.82 | 4.8 | 1 | **0.028*** |
| HRV | 1 | Timepoint | Intercept participant | -327.92 | -304.11 | 169.96 | - | - | - | - |
|  | 2 | YOH * CORT | - | -323.01 | -287.29 | 170.5 | 4.91 | 1.1 | 3 | 0.781 |
|  | 3 | Age | - | -336.92 | -297.24 | 178.46 | 13.91 | 15.9 | 1 | **0.000***** |
| Heart rate | 1 | Timepoint | Intercept participant | 2613 | 2636.7 | -1300.5 | - | - | - | - |
|  | 2 | - | Slope timepoint | 2610.5 | 2642.2 | -1297.3 | 2.5 | 6.4 | 2 | **0.040*** |
|  | 3 | YOH * CORT | - | 2614.6 | 2658.1 | -1296.3 | -4.1 | 2 | 3 | 0.581 |
|  | 4 | Timepoint * YOH + Timepoint * CORT | - | 2613.5 | 2680.8 | -1289.7 | 1.1 | 13.1 | 6 | **0.042*** |
|  | 5 | Timeslot | - | 2604.1 | 2675.3 | -1284 |  | 11.4 | 1 | **0.001***** |
| Subjective valence | 1 | Timepoint | Intercept participant | 1169.8 | 1193.8 | -578.9 | - | - | - | - |
|  | 2 | - | Slope timepoint | 1164.4 | 1196.4 | -574.21 | 5.4 | 9.4 | 2 | **0.009**** |
|  | 3 | YOH * CORT | - | 1167.8 | 1211.7 | -572.87 | -3.4 | 2.7 | 3 | 0.444 |
| Subjective arousal | 1 | Timepoint | Intercept participant | 1230 | 1253.9 | -608.98 | - | - | - | - |
|  | 2 | - | Slope timepoint | 1201.2 | 1233.1 | -592.60 | 28.8 | 32.8 | 2 | **0.000***** |
|  | 3 | YOH * CORT | - | 1201.5 | 1245.4 | -589.74 | -0.3 | 5.7 | 3 | 0.126 |
|  | 4 | Age | - | 1197.1 | 1245 | -586.53 | 4.4 | 6.4 | 1 | **0.011*** |
|  | 5 | Age * YOH | - | 1192 | 1243.8 | -582.98 | 5.1 | 7.1 | 1 | **0.008**** |
|  | 6 | Age * Timepoint | - | 1180.2 | 1244 | -574.08 | 11.8 | 17.8 | 3 | **0.000***** |
| *: p-value <.05 | | | | | | | | | | |
| **: p-value <.01 | | | | | | | | | | |
| ***: p-value <.001 | | | | | | | | | | |

| **Table S6.** All binomial generalized linear mixed models of moral choice. Each model added another predictor, affecting the AIC, BIC and Log Likelihood. Model comparisons done with log-likelihood tests: model 1 represents the baseline model, while X2 values reflect comparisons to preceding model. All models included 100 participants. | | | | | | | | | | |
| --- | --- | --- | --- | --- | --- | --- | --- | --- | --- | --- |
| **Choice outcome** | **Model** | **Fixed effects** | **Random effects** | **AIC** | **BIC** | **LogLik** | **ΔAIC** | **X2** | **df** | **p** |
| Deontological | 1 | YOH * CORT | Intercept participant | 1426.0 | 1454.2 | -708.0 | - | - | - | - |
| Deontological | 2 | - | Intercept scenario | 1219.0 | 1252.9 | -603.5 | 207 | 208.9 | 1 | **0.000***** |
| Deontological | 3 | Education | - | 1221.4 | 1266.6 | -602.7 | -2.3 | 1.7 | 2 | 0.433 |
| Deontological | 4 | Age | - | 1223.3 | 1274.2 | -602.7 | -2.4 | 0 | 1 | 1 |
| Compromise | 1 | YOH * CORT | Intercept participant | 1786.5 | 1814.8 | -888.3 | - | - | - | - |
| Compromise | 2 | - | Intercept scenario | 1076.2 | 1110.1 | -532.1 | 710.3 | 712.4 | 1 | **0.000***** |
| Compromise | 3 | Education | - | 1073.2 | 1118.4 | -528.6 | 3 | 7.0 | 2 | **0.030*** |
| Compromise | 4 | Age | - | 1074.9 | 1125.8 | -528.5 | -1.7 | 0.3 | 1 | 0.603 |
| Utillitarian | 1 | YOH * CORT | Intercept participant | 1516.0 | 1544.2 | -753.0 | - | - | - | - |
| Utillitarian | 2 | - | Intercept scenario | 830.6 | 864.5 | -409.3 | 685.4 | 687.4 | 1 | **0.000***** |
| Utillitarian | 3 | Education | - | 830.5 | 875.7 | -407.3 | 0.1 | 4.1 | 2 | 0.131 |
| Utillitarian | 4 | Age | - | 832.3 | 883.2 | -407.2 | -1.8 | 0.2 | 1 | 0.651 |
| *: p-value <.05 | | | | | | | | | | |
| **: p-value <.01 | | | | | | | | | | |
| ***: p-value <.001 | | | | | | | | | | |

| **Table S7.** All binomial generalized linear models of moral phenotype. Each model added another predictor, affecting the residual deviance, AIC, and BIC. Model comparisons done with log-likelihood tests: model 1 represents the baseline model, while X2 values reflect comparisons to preceding model. All models included 100 participants. | | | | | | | | | |
| --- | --- | --- | --- | --- | --- | --- | --- | --- | --- |
| **Model** | **Predictor** | **Residual Deviance** | **Res. Df** | **AIC** | **BIC** | **ΔAIC** | **X2** | **Δdf** | **p** |
| 1 | YOH * CORT | 124.58 | 91 | 132.58 | 142.80 | - | - |  | - |
| 2 | Education | 123.82 | 89 | 135.82 | 151.14 | -3.2 | 0.8 | 2 | 0.684 |
| 3 | Age | 123.69 | 88 | 137.69 | 155.56 | -2.1 | 0.1 | 1 | 0.714 |
| *: p-value <.05 | | | | | | | | | |
| **: p-value <.01 | | | | | | | | | |
| ***: p-value <.001 | | | | | | | | | |

| **Table S8.** All linear models of moral spectrum and consistency scores. Each model added another predictor, affecting R2 and adjusted R2. Model comparisons were done with likelihood tests: model 1 represents the baseline model, while F values reflect comparisons to preceding model. | | | | | | | |
| --- | --- | --- | --- | --- | --- | --- | --- |
| **Outcome** | **Model** | **Predictor** | **R2** | **Adj. R2** | **ΔR2** | **F** | **p** |
| Spectrum score | 1 | YOH * CORT | 0.01 | -0.02 | - | - | - |
|  | 2 | Education | 0.03 | -0.03 | -0.02 | 0.91 (2, 94) | 0.407 |
|  | 3 | Age | 0.03 | -0.04 | -0.00 | 0.69 (1, 93) | 0.691 |
| Consistency score | 1 | YOH * CORT | 0.01 | -0.02 | - | - | - |
|  | 2 | Education | 0.03 | -0.02 | -0.02 | 1.09 (2, 94) | 0.340 |
|  | 3 | Age | 0.04 | -0.03 | -0.00 | 0.21 (1, 93) | 0.650 |
| *: p-value <.05 | | | | | | | |
| **: p-value <.01 | | | | | | | |
| ***: p-value <.001 | | | | | | | |

| **Table S9.** All linear mixed models of certainty scores, response times and choice response times. Each model added another predictor, affecting the AIC, BIC and Log Likelihood. Model comparisons done with log-likelihood tests: model 1 represents the baseline model, while X2 values reflect comparisons to preceding model. All models included 100 participants. | | | | | | | | | | |
| --- | --- | --- | --- | --- | --- | --- | --- | --- | --- | --- |
| **Outcome** | **Model** | **Fixed effects** | **Random effects** | **AIC** | **BIC** | **LogLik** | **ΔAIC** | **X2** | **df** | **p** |
| Certainty score | 1 | YOH * CORT * Choice | Intercept participant | 4324.4 | 4403.5 | -2148.2 | - | - | - | - |
|  | 2 | Education | - | 4327.5 | 4417.9 | -2147.7 | -3.1 | 0.94 | 2 | 0.624 |
|  | 3 | Age | - | 4325.7 | 4421.7 | -2145.8 | 1.8 | 3.77 | 1 | 0.052 |
| Certainty length | 1 | YOH * CORT + YOH * Length + CORT * Length | Intercept participant | 4460.9 | 4517.4 | -2220.4 | - | - | - | - |
|  | 2 | - | Intercept scenario | 4307.4 | 4375.2 | -2141.7 | 153.5 | 157.44 | 2 | **0.000***** |
|  | 3 | Education | - | 4311.1 | 4390.2 | -2141.5 | -3.7 | 0.37 | 2 | 0.832 |
|  | 4 | Age | - | 4311.2 | 4395.9 | -2140.6 | -0.1 | 1.88 | 1 | 0.170 |
| Certainty score time | 1 | YOH * CORT + YOH * Choice + CORT * Choice | Intercept participant | 3074.8 | 3142.5 | -1525.4 | - | - | - | - |
|  | 2 | Education | - | 3076.8 | 3155.9 | -1524.4 | -2 | 1.91 | 2 | 0.384 |
|  | 3 | Age | - | 3075.9 | 3160.7 | -1523 | 0.9 | 2.89 | 1 | 0.089 |
| Certainty length time | 1 | YOH * CORT + YOH * Length + CORT * Length | Intercept participant | 3067.9 | 3118.7 | -1525 | - | - | - | - |
|  | 2 | Education | - | 3069.9 | 3132 | -1524 | -2 | 2.00 | 2 | 0.368 |
|  | 3 | Age | - | 3069.2 | 3137 | -1522.6 | 0.7 | 2.72 | 1 | 0.099 |
| Choice time | 1 | YOH * CORT + YOH * Choice + CORT * Choice | Intercept participant | 4106.6 | 4174.4 | -2041.3 | - | - | - | - |
|  | 2 | - | Intercept scenario | 4051.7 | 4125.1 | -2012.8 | 54.9 | 56.9 | 1 | **0.000***** |
|  | 3 | - | Slope choice | 4044.8 | 4146.5 | -2004.4 | 6.9 | 16.9 | 5 | **0.005**** |
|  | 4 | Education | - | 4042.4 | 4155.4 | -2001.2 | 2.4 | 6.4 | 2 | **0.041*** |
|  | 5 | Age | - | 4044.2 | 4162.8 | -2001.1 | -1.8 | 0.2 | 1 | 0.628 |
| Choice length time | 1 | YOH * CORT + YOH * Length + CORT * Length | Intercept participant | 4052.1 | 4102.9 | -2017 | - | - | - | - |
|  | 2 | - | Slope length | 4007.5 | 4069.6 | -1992.7 | 44.6 | 48.6 | 2 | **0.000***** |
|  | 3 | Education | - | 4003.4 | 4076.9 | -1988.7 | 4.1 | 8 | 2 | **0.018*** |
|  | 4 | Age | - | 4005.4 | 4084.5 | -1988.7 | -2 | 0 | 1 | 0.976 |
| *: p-value <.05 | | | | | | | | | | |
| **: p-value <.01 | | | | | | | | | | |
| ***: p-value <.001 | | | | | | | | | | |

Final models for each analysis (see *Table S10 – S23*)

| **Table S10.** Final full linear mixed model for salivary alpha-amylase. Outcome was log transformed. Estimation was done with REML. Final model included 100 participants. | | | | |
| --- | --- | --- | --- | --- |
| **Fixed effects** | **Estimate (SE)** | **df** | **t** | **p** |
| Intercept | 5.297 (0.061) | 105 | 86.684 | **0.000***** |
| ΔT1-T0 | 0.198 (0.030) | 265 | 6.569 | **0.000***** |
| ΔT2-T0 | 0.156 (0.034) | 230 | 4.577 | **0.000***** |
| ΔT3-T0 | 0.130 (0.040) | 108 | 3.270 | **0.001**** |
| YOH | 0.030 (0.084) | 104 | 0.355 | 0.724 |
| CORT | -0.008 (0.084) | 104 | -0.098 | 0.922 |
| Age | 0.008 (0.003) | 95 | 2.912 | **0.004**** |
| ΔT1-T0 * YOH | 0.208 (0.034) | 265 | 6.060 | **0.000***** |
| ΔT2-T0 * YOH | 0.224 (0.039) | 230 | 5.777 | **0.000***** |
| ΔT3-T0 * YOH | 0.220 (0.045) | 108 | 4.848 | **0.000***** |
| ΔT1-T0 * CORT | -0.051 (0.034) | 265 | -1.480 | 0.140 |
| ΔT2-T0 * CORT | -0.047 (0.039) | 230 | -1.210 | 0.228 |
| ΔT3-T0 * CORT | 0.020 (0.045) | 108 | 0.443 | 0.659 |
| YOH * CORT | 0.002 (0.070) | 94 | 0.033 | 0.974 |
| **Random effects** | **Variance (SD)** | **r** |  |  |
| Intercept participant | 0.077 (0.277) | - |  |  |
| Slope timepoint | 0.003 (0.053) | 0.10 |  |  |
| Residual | 0.013 (0.115) | - |  |  |
| *: p-value <.05 | | | | |
| **: p-value <.01 | | | | |
| ***: p-value <.001 | | | | |

| **Table S11.** Final full linear mixed model for salivary cortisol. Outcome was log transformed. Estimation was done with REML. Final model included 100 participants. | | | | |
| --- | --- | --- | --- | --- |
| **Fixed effects** | **Estimate (SE)** | **df** | **t** | **p** |
| Intercept | 0.445 (0.084) | 196 | 5.326 | **0.000***** |
| ΔT1-T0 | -0.088 (0.079) | 234 | -1.112 | 0.267 |
| ΔT2-T0 | -0.139 (0.079) | 285 | -1.754 | 0.080 |
| ΔT3-T0 | -0.141 (0.079) | 119 | -1.774 | 0.079 |
| YOH | -0.052 (0.110) | 163 | -0.470 | 0.639 |
| CORT | -0.043 (0.109) | 165 | -0.391 | 0.696 |
| ΔT1-T0 * YOH | 0.123 (0.090) | 234 | 1.363 | 0.174 |
| ΔT2-T0 * YOH | 0.300 (0.090) | 285 | 3.328 | **0.001***** |
| ΔT3-T0 * YOH | 0.368 (0.090) | 119 | 4.069 | **0.000***** |
| ΔT1-T0 * CORT | 1.467 (0.090) | 234 | 16.290 | **0.000***** |
| ΔT2-T0 * CORT | 1.398 (0.090) | 285 | 15.495 | **0.000***** |
| ΔT3-T0 * CORT | 1.316 (0.090) | 119 | 14.542 | **0.000***** |
| YOH * CORT | -0.032 (0.133) | 96 | -0.237 | 0.813 |
| **Random effects** | **Variance (SD)** |  |  |  |
| Intercept participant | 0.086 (0.293) |  |  |  |
| Slope timepoint | 0.000 (0.016) |  |  |  |
| Residual | 0.101 (0.318) |  |  |  |
| *: p-value <.05 | | | | |
| **: p-value <.01 | | | | |
| ***: p-value <.001 | | | | |

| **Table S12.** Final full linear mixed model for pupil size. Estimation was done with REML. Final model included 100 participants. | | | | |
| --- | --- | --- | --- | --- |
| **Fixed effects** | **Estimate (SE)** | **df** | **t** | **p** |
| Intercept | 3.122 (0.131) | 99 | 23.878 | **0.000***** |
| ΔT1-T0 | 0.018 (0.053) | 277 | 0.334 | 0.739 |
| ΔT2-T0 | -0.084 (0.063) | 204 | -1.341 | 0.182 |
| ΔT3-T0 | -0.101 (0.077) | 105 | -1.305 | 0.195 |
| YOH | -0.121 (0.183) | 98 | -0.662 | 0.509 |
| CORT | -0.079 (0.180) | 98 | -0.438 | 0.663 |
| Age | -0.005 (0.009) | 94 | -0.611 | 0.542 |
| ΔT1-T0 * YOH | 0.311 (0.060) | 277 | 5.183 | **0.000***** |
| ΔT2-T0 * YOH | 0.397 (0.072) | 204 | 5.530 | **0.000***** |
| ΔT3-T0 * YOH | 0.429 (0.088) | 105 | 4.876 | **0.000***** |
| ΔT1-T0 * CORT | -0.030 (0.060) | 277 | -0.505 | 0.614 |
| ΔT2-T0 * CORT | 0.149 (0.072) | 204 | 2.072 | **0.040*** |
| ΔT3-T0 * CORT | 0.132 (0.088) | 105 | 1.503 | 0.136 |
| YOH * CORT | 0.065 (0.253) | 94 | 0.258 | 0.797 |
| CORT * Age | -0.026 (0.012) | 94 | -2.164 | **0.033*** |
| **Random effects** | **Variance (SD)** | **r** |  |  |
| Intercept participant | 0.385 (0.621) | - |  |  |
| Slope timepoint | 0.013 (0.114) | 0.21 |  |  |
| Residual | 0.039 (0.197) | - |  |  |
| *: p-value <.05 | | | | |
| **: p-value <.01 | | | | |
| ***: p-value <.001 | | | | |

| **Table S13.** Final full linear mixed model for heart-rate. Estimation was done with REML. Final model included 98 participants. | | | | |
| --- | --- | --- | --- | --- |
| **Fixed effects** | **Estimate (SE)** | **df** | **t** | **p** |
| Intercept | 71.474 (2.476) | 109 | 28.871 | **0.000***** |
| ΔT1-T0 | -5.463 (1.192) | 248 | -4.583 | **0.000***** |
| ΔT2-T0 | -4.410 (1.288) | 243 | -3.425 | **0.001***** |
| ΔT3-T0 | -3.559 (1.433) | 108 | -2.484 | **0.015*** |
| YOH | -0.709 (2.853) | 107 | -0.248 | 0.804 |
| CORT | 0.211 (2.797) | 107 | 0.075 | 0.940 |
| Timeslot | -6.504 (1.921) | 93 | -3.386 | **0.001**** |
| ΔT1-T0 * YOH | 4.521 (1.345) | 247 | 3.361 | **0.001***** |
| ΔT2-T0 * YOH | 2.947 (1.454) | 244 | 2.027 | **0.044*** |
| ΔT3-T0 * YOH | 2.868 (1.619) | 108 | 1.771 | 0.079 |
| ΔT1-T0 * CORT | -1.030 (1.346) | 247 | -0.765 | 0.445 |
| ΔT2-T0 * CORT | 0.241 (1.455) | 244 | 0.165 | 0.869 |
| ΔT3-T0 * CORT | -0.973 (1.620) | 108 | -0.601 | 0.549 |
| YOH * CORT | 1.296 (3.765) | 93 | 0.344 | 0.731 |
| **Random effects** | **Variance (SD)** | **r** |  |  |
| Intercept participant | 78.820 (8.878) | - |  |  |
| Slope timepoint | 2.469 (1.571) | 0.02 |  |  |
| Residual | 20.317 (4.507) | - |  |  |
| *: p-value <.05 | | | | |
| **: p-value <.01 | | | | |
| ***: p-value <.001 | | | | |

| **Table S14.** Final full linear mixed model for HRV (RMSSD). Estimation was done with REML. Final model included 99 participants. | | | | |
| --- | --- | --- | --- | --- |
| **Fixed effects** | **Estimate (SE)** | **df** | **t** | **p** |
| Intercept | 1.602 (0.037) | 111 | 43.822 | **0.000***** |
| ΔT1-T0 | 0.117 (0.017) | 290 | 6.869 | **0.000***** |
| ΔT2-T0 | 0.090 (0.017) | 290 | 5.275 | **0.000***** |
| ΔT3-T0 | 0.093 (0.017) | 290 | 5.428 | **0.000***** |
| YOH | 0.018 (0.050) | 94 | 0.369 | 0.713 |
| CORT | 0.003 (0.049) | 94 | 0.065 | 0.948 |
| Age | -0.007 (0.002) | 94 | -4.050 | **0.000***** |
| YOH * CORT | 0.002 (0.070) | 94 | 0.033 | 0.974 |
| **Random effects** | **Variance (SD)** |  |  |  |
| Intercept participant | 0.026 (0.160) |  |  |  |
| Residual | 0.014 (0.119) |  |  |  |
| *: p-value <.05 | | | | |
| **: p-value <.01 | | | | |
| ***: p-value <.001 | | | | |


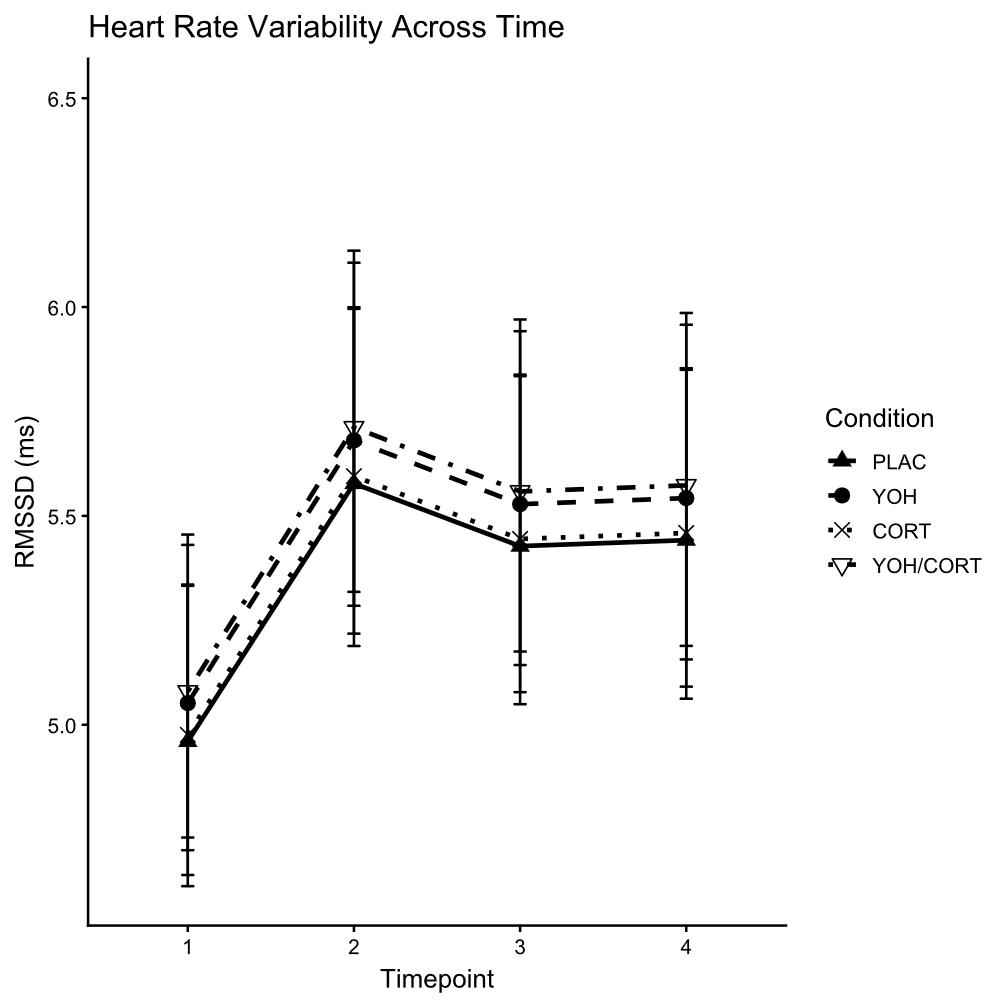


| **Table S15.** Final full linear mixed model for subjective valence score. Estimation was done with REML. Final model included 100 participants. | | | | |
| --- | --- | --- | --- | --- |
| **Fixed effects** | **Estimate (SE)** | **df** | **t** | **p** |
| Intercept | 6.793 (0.215) | 108 | 31.617 | **0.000***** |
| ΔT1-T0 | -0.270 (0.111) | 251 | -2.428 | **0.016*** |
| ΔT2-T0 | -0.700 (0.117) | 273 | -5.997 | **0.000***** |
| ΔT3-T0 | -0.700 (0.125) | 116 | -5.584 | **0.000***** |
| YOH | -0.279 (0.291) | 96 | -0.958 | 0.340 |
| CORT | 0.175 (0.288) | 96 | 0.608 | 0.545 |
| YOH * CORT | 0.028 (0.407) | 96 | 0.068 | 0.946 |
| **Random effects** | **Variance (SD)** | **r** |  |  |
| Intercept participant | 0.951 (0.975) | - |  |  |
| Slope timepoint | 0.042 (0.204) | 0.51 |  |  |
| Residual | 0.598 (0.773) | - |  |  |
| *: p-value <.05 | | | | |
| **: p-value <.01 | | | | |
| ***: p-value <.001 | | | | |

| **Table S16.** Final full linear mixed model for subjective arousal score. Estimation was done with REML. Final model included 100 participants. | | | | |
| --- | --- | --- | --- | --- |
| **Fixed effects** | **Estimate (SE)** | **df** | **t** | **p** |
| Intercept | 5.485 (0.253) | 113 | 21.714 | **0.000***** |
| ΔT1-T0 | 0.440 (0.102) | 282 | 4.305 | **0.000***** |
| ΔT2-T0 | 0.400 (0.123) | 203 | 3.246 | **0.001**** |
| ΔT3-T0 | 0.380 (0.152) | 106 | 2.502 | **0.014*** |
| YOH | 0.478 (0.332) | 94 | 1.440 | 0.153 |
| CORT | 0.293 (0.334) | 94 | 0.879 | 0.382 |
| Age | 0.081 (0.018) | 119 | 4.524 | **0.000***** |
| YOH * CORT | -0.083 (0.471) | 94 | -0.177 | 0.860 |
| YOH * Age | -0.060 (0.023) | 94 | -2.652 | **0.009**** |
| ΔT1-T0 * Age | -0.033 (0.010) | 282 | -3.350 | **0.001***** |
| ΔT2-T0 * Age | -0.037 (0.012) | 203 | -3.148 | **0.002**** |
| ΔT3-T0 * Age | -0.018 (0.015) | 106 | -1.236 | 0.219 |
| **Random effects** | **Variance (SD)** | **r** |  |  |
| Intercept participant | 1.219 (1.104) | - |  |  |
| Slope timepoint | 0.1578 (0.397) | -0.04 |  |  |
| Residual | 0.443 (0.666) | - |  |  |
| *: p-value <.05 | | | | |
| **: p-value <.01 | | | | |
| ***: p-value <.001 | | | | |


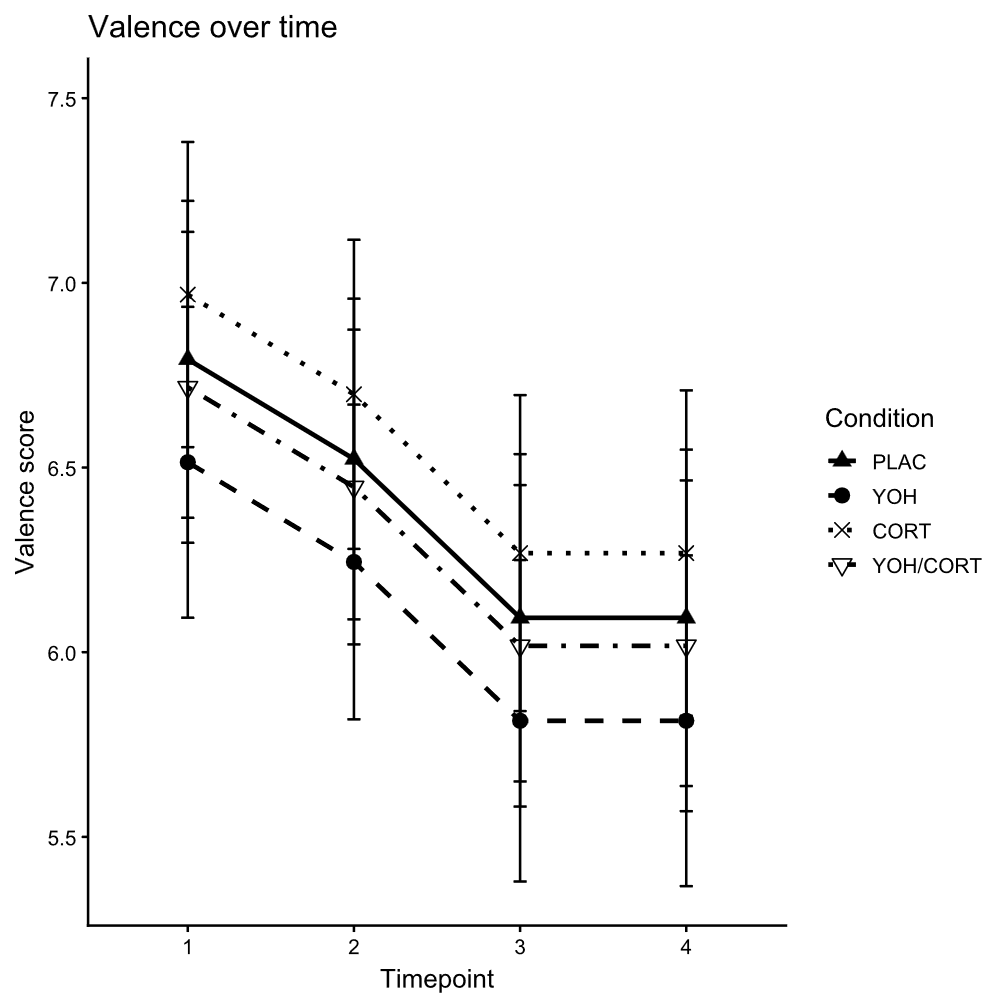

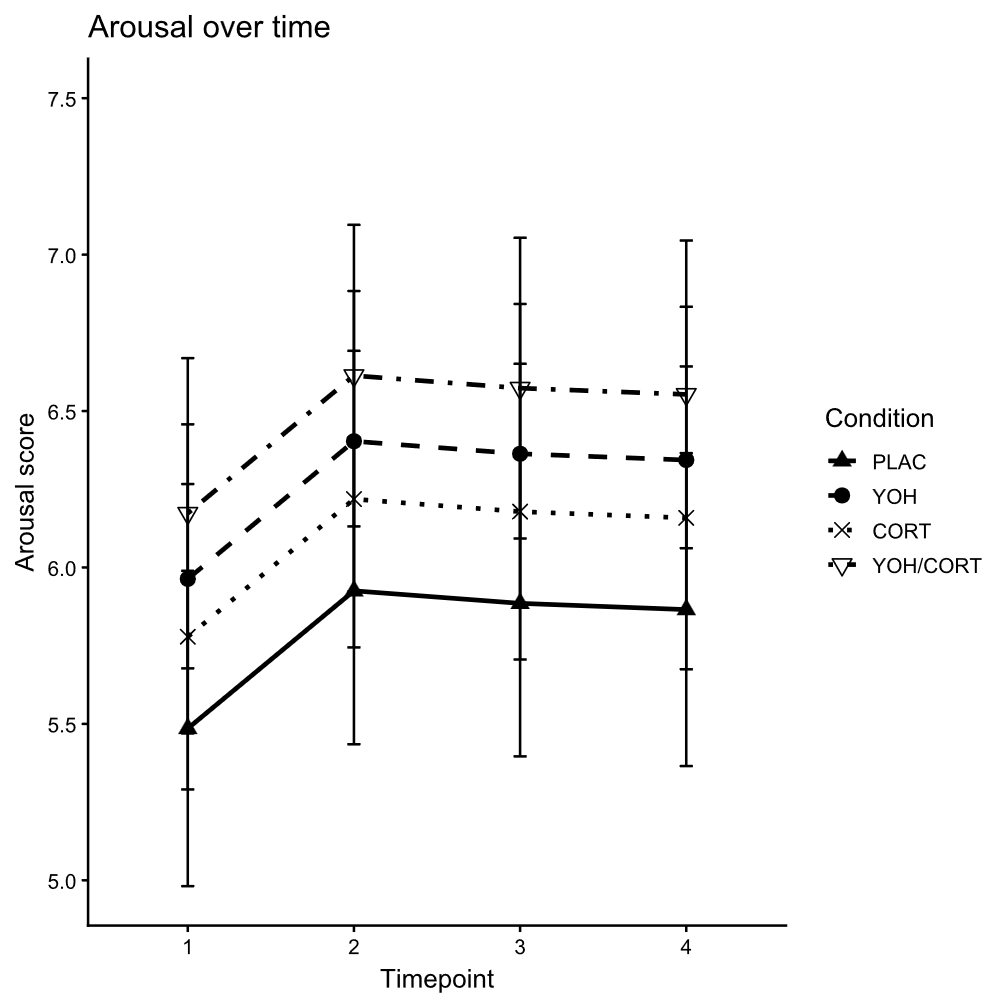


| **Table S17.** Model estimates of three binomial generalised linear mixed models of moral choice. Estimation was done using maximum likelihood with Laplace approximation. Covariates included education and age. All tests included data of 100 participants. | | | | | | | | | |
| --- | --- | --- | --- | --- | --- | --- | --- | --- | --- |
|  | *Deontological choice* | | | *Compromise choice* | | | *Utilitarian choice* | | |
| **Fixed effects** | **Estimate (SE)** | **z** | **p** | **Estimate (SE)** | **z** | **p** | **Estimate (SE)** | **z** | **p** |
| Intercept | 0.248 (1.749) | 0.142 | 0.887 | -2.561 (1.699) | -1.508 | 0.132 | -8.916 (2.293) | -3.889 | **0.000***** |
| YOH | -0.323 (1.863) | -0.173 | 0.862 | -0.422 (1.350) | -0.312 | 0.755 | 0.635 (2.024) | 0.314 | 0.754 |
| CORT | 0.211 (1.811) | 0.116 | 0.907 | 0.638 (1.334) | 0.478 | 0.633 | -1.700 (2.078) | -0.818 | 0.413 |
| ΔEducation med-low | 2.130 (1.766) | 1.206 | 0.228 | -2.674 (1.320) | -2.027 | **0.043*** | 0.238 (2.020) | 0.118 | 0.906 |
| ΔEducation med-high | 1.147 (1.686) | 0.680 | 0.496 | -3.320 (1.272) | -2.610 | **0.009**** | 3.139 (1.931) | 1.626 | 0.104 |
| Age | 0.004 (0.065) | 0.067 | 0.947 | -0.026 (0.050) | -0.518 | 0.604 | 0.337 (0.737) | 0.457 | 0.648 |
| YOH * CORT | 0.304 (2.604) | 0.117 | 0.907 | -1.633 (1.951) | -0.837 | 0.402 | 2.865 (2.850) | 1.005 | 0.315 |
| **Random effects** | **Variance** |  |  | **Variance** |  |  | **Variance** |  |  |
| Intercept participant | 31.616 (5.623) |  |  | 17.310 (4.161) |  |  | 35.020 (5.918) |  |  |
| Intercept scenario | 2.384 (1.544) |  |  | 23.830 (4.882) |  |  | 14.870 (3.857) |  |  |
| *: p-value <.05 | | | | | | | | | |
| **: p-value <.01 | | | | | | | | | |
| ***: p-value <.001 | | | | | | | | | |

| **Table S18.** Model estimates of a generalised linear model of moral phenotype, a linear model of moral spectrum score, and a linear model of moral consistency score. Estimation for phenotype was done with maximum likelihood, while the linear models used OLS. Covariates included education and age. All tests included data of 100 participants. | | | | | | | | | |
| --- | --- | --- | --- | --- | --- | --- | --- | --- | --- |
|  | *Moral phenotype* | | | *Moral spectrum score* | | | *Consistency score* | | |
| **Coefficients** | **Estimate (SE)** | **z** | **p** | **Estimate (SE)** | **t** | **p** | **Estimate (SE)** | **t** | **p** |
| Intercept | 0.157 (0.498) | 0.316 | 0.752 | 0.737 (0.075) | 9.832 | **0.000***** | 0.990 (0.005) | 203.861 | **0.000***** |
| YOH | 0.041 (0.593) | 0.069 | 0.945 | 0.002 (0.089) | 0.019 | 0.985 | 0.002 (0.006) | 0.364 | 0.716 |
| CORT | 0.636 (0.621) | 1.025 | 0.305 | 0.052 (0.089) | 0.584 | 0.560 | -0.005 (0.006) | -0.781 | 0.437 |
| ΔEducation med-low | 0.521 (0.592) | 0.880 | 0.379 | 0.080 (0.085) | -0.937 | 0.351 | -0.001 (0.005) | -0.100 | 0.921 |
| ΔEducation med-high | 0.066 (0.503) | 0.132 | 0.895 | -0.089 (0.073) | -1.216 | 0.227 | 0.006 (0.005) | 1.192 | 0.236 |
| Age | -0.008 (0.022) | -0.367 | 0.714 | -0.001 (0.003) | -0.399 | 0.691 | 0.000 (0.000) | -0.455 | 0.650 |
| YOH * CORT | -0.658 (0.883) | -0.745 | 0.456 | -0.079 (0.127) | -0.621 | 0.536 | 0.001 (0.008) | 0.064 | 0.949 |
| *: p-value <.05 | | | | | | | | | |
| **: p-value <.01 | | | | | | | | | |
| ***: p-value <.001 | | | | | | | | | |

| **Table S19.** MANCOVA for the asymptotic maximum (α), rate of change (β), and inflection point (σ) of YOH and CORT. Nonlinear least-squares modelling was done per participant. | | | | |
| --- | --- | --- | --- | --- |
| **Predictor** | **df** | **Pillai** | **Approx. F** | **p** |
| YOH | 1 | 0.082 | 1.485 | 0.230 |
| CORT | 1 | 0.131 | 2.516 | 0.069 |
| Education | 6 | 0.453 | 1.540 | 0.083 |
| Age | 1 | 0.018 | 0.310 | 0.818 |
| YOH * CORT | 1 | 0.046 | 0.797 | 0.501 |
| Residuals | 52 |  |  |  |
| *: p-value <.05 | | | | |
| **: p-value <.01 | | | | |
| ***: p-value <.001 | | | | |


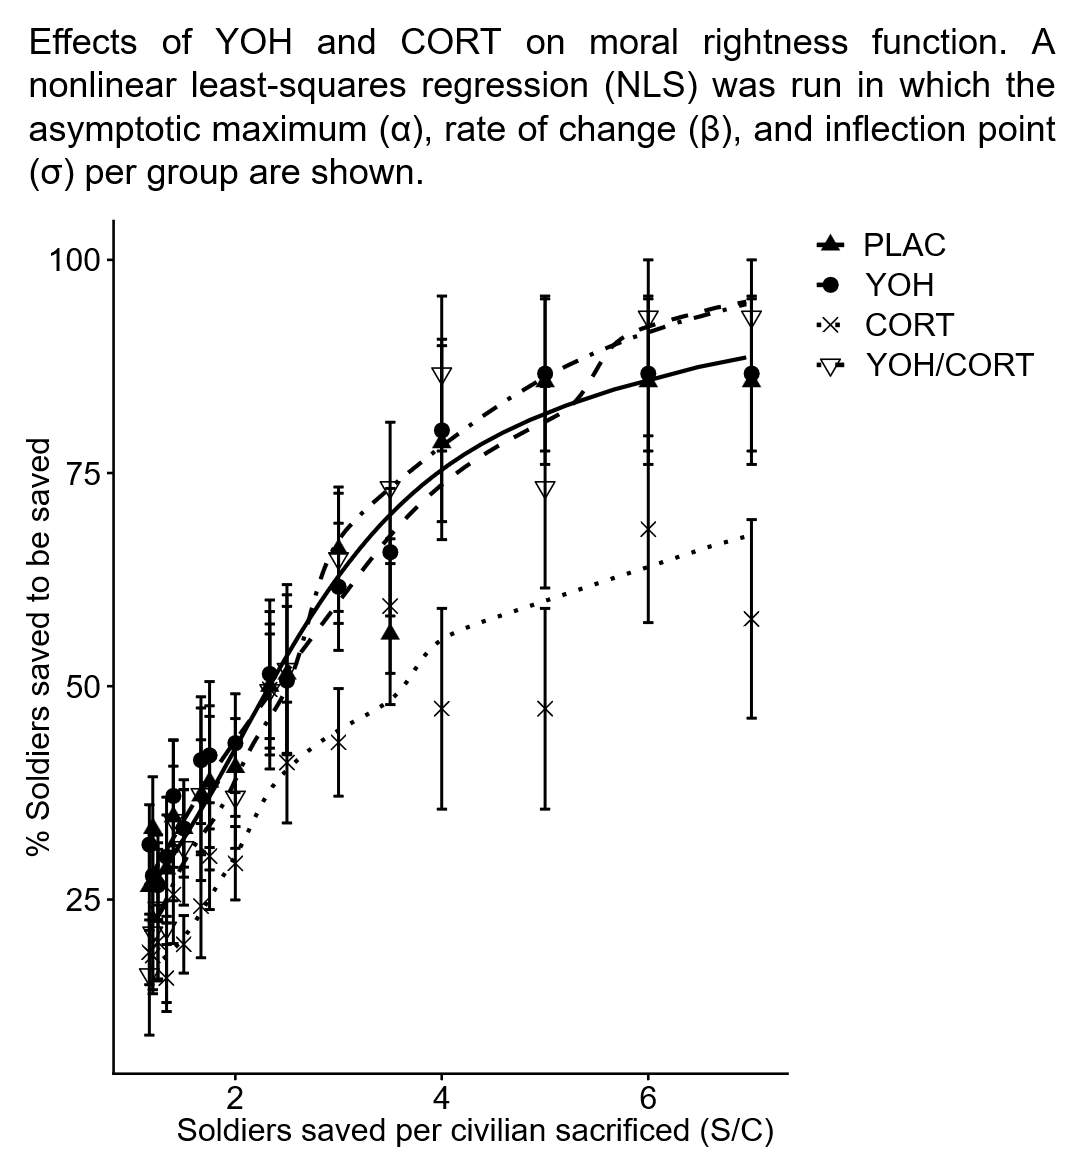


| **Table S20.** Model estimates of a linear mixed model of certainty response time in relation to choice type (U = utilitarian; C = compromise; D = deontological). Outcome was log transformed Estimation was done with REML. Final model included 100 participants. | | | | |
| --- | --- | --- | --- | --- |
| **Fixed effects** | **Estimate (SE)** | **df** | **t** | **p** |
| Intercept | 0.829 (0.092) | 111 | 9.003 | **0.000***** |
| YOH | 0.066 (0.100) | 111 | 0.661 | 0.510 |
| CORT | 0.022 (0.099) | 109 | 0.226 | 0.822 |
| ΔU-D | 0.027 (0.076) | 1404 | 0.348 | 0.728 |
| ΔC-D | -0.017 (0.067) | 1221 | -0.250 | 0.803 |
| ΔEducation med-low | -0.052 (0.090) | 93 | -0.573 | 0.568 |
| ΔEducation med-high | -0.082 (0.088) | 94 | -0.938 | 0.351 |
| Age | 0.005 (0.003) | 93 | 1.645 | 0.103 |
| YOH * CORT | 0.009 (0.135) | 93 | 0.069 | 0.945 |
| YOH * ΔU-D | 0.101 (0.080) | 1764 | 1.268 | 0.205 |
| YOH * ΔC-D | 0.066 (0.072) | 1658 | 0.919 | 0.358 |
| CORT * ΔU-D | -0.075 (0.082) | 1592 | -0.907 | 0.365 |
| CORT * ΔC-D | 0.013 (0.074) | 1488 | 0.181 | 0.857 |
| **Random effects** | **Variance (SD)** |  |  |  |
| Intercept participant | 0.096 (0.309) |  |  |  |
| Residual | 0.225 (0.475) |  |  |  |
| *: p-value <.05 |  |  |  |  |
| **: p-value <.01 |  |  |  |  |
| ***: p-value <.001 |  |  |  |  |

| **Table S21.** Model estimates of a linear mixed model of certainty response time in relation to the number of choice options. Outcome was log transformed. Estimation was done with REML. Final model included 100 participants. | | | | |
| --- | --- | --- | --- | --- |
| **Fixed effects** | **Estimate (SE)** | **df** | **t** | **p** |
| Intercept | 0.830 (0.087) | 93 | 9.554 | **0.000***** |
| YOH | 0.105 (0.095) | 93 | 1.114 | 0.268 |
| CORT | 0.016 (0.094) | 93 | 0.174 | 0.862 |
| Options | 0.019 (0.012) | 1997 | 1.542 | 0.123 |
| ΔEducation med-low | -0.057 (0.090) | 93 | -0.628 | 0.532 |
| ΔEducation med-high | -0.085 (0.087) | 93 | -0.969 | 0.335 |
| Age | 0.005 (0.003) | 93 | 1.603 | 0.112 |
| YOH * CORT | 0.003 (0.135) | 93 | 0.022 | 0.982 |
| YOH * Options | -0.013 (0.014) | 1997 | -0.933 | 0.351 |
| CORT * Options | -0.028 (0.014) | 1997 | -2.040 | **0.042*** |
| **Random effects** | **Variance (SD)** |  |  |  |
| Intercept participant | 0.096 (0.310) |  |  |  |
| Residual | 0.225 (0.474) |  |  |  |
| *: p-value <.05 | | | | |
| **: p-value <.01 | | | | |
| ***: p-value <.001 | | | | |

| **Table S22.** Model estimates of a linear mixed model of choice response time in relation to choice type (U = utilitarian; C = compromise; D = deontological). Outcome was log transformed. Estimation was done with REML. Final model included 100 participants. | | | | |
| --- | --- | --- | --- | --- |
| **Fixed effects** | **Estimate (SE)** | **df** | **t** | **p** |
| Intercept | 2.104 (0.136) | 119 | 15.503 | **0.000***** |
| YOH | -0.035 (0.142) | 108 | -0.243 | 0.808 |
| CORT | 0.008 (0.143) | 106 | 0.055 | 0.957 |
| ΔU-D | -0.079 (0.107) | 97 | -0.739 | 0.462 |
| ΔC-D | 0.190 (0.113) | 66 | 1.679 | 0.098 |
| ΔEducation med-low | -0.247 (0.119) | 74 | -2.081 | **0.041*** |
| ΔEducation med-high | -0.256 (0.113) | 68 | -2.262 | **0.027*** |
| Age | 0.002 (0.004) | 68 | 0.454 | 0.651 |
| YOH * CORT | 0.105 (0.172) | 64 | 0.608 | 0.545 |
| YOH * ΔU-D | 0.100 (0.112) | 62 | 0.892 | 0.376 |
| YOH * ΔC-D | 0.190 (0.123) | 55 | 1.544 | 0.128 |
| CORT * ΔU-D | -0.117 (0.115) | 71 | -1.016 | 0.313 |
| CORT * ΔC-D | -0.039 (0.125) | 56 | -0.311 | 0.757 |
| **Random effects** | **Variance (SD)** | **r** |  |  |
| Intercept participant | 0.251 (0.501) | - | - |  |
| Slope ΔU-D | 0.055 (0.235) | -0.89 | - |  |
| Slope ΔC-D | 0.110 (0.332) | -0.51 | 0.61 |  |
| Intercept scenario | 0.022 (0.147) | - | - |  |
| Residual | 0.337 (0.581) | - | - |  |
| *: p-value <.05 |  |  |  |  |
| **: p-value <.01 |  |  |  |  |
| ***: p-value <.001 |  |  |  |  |


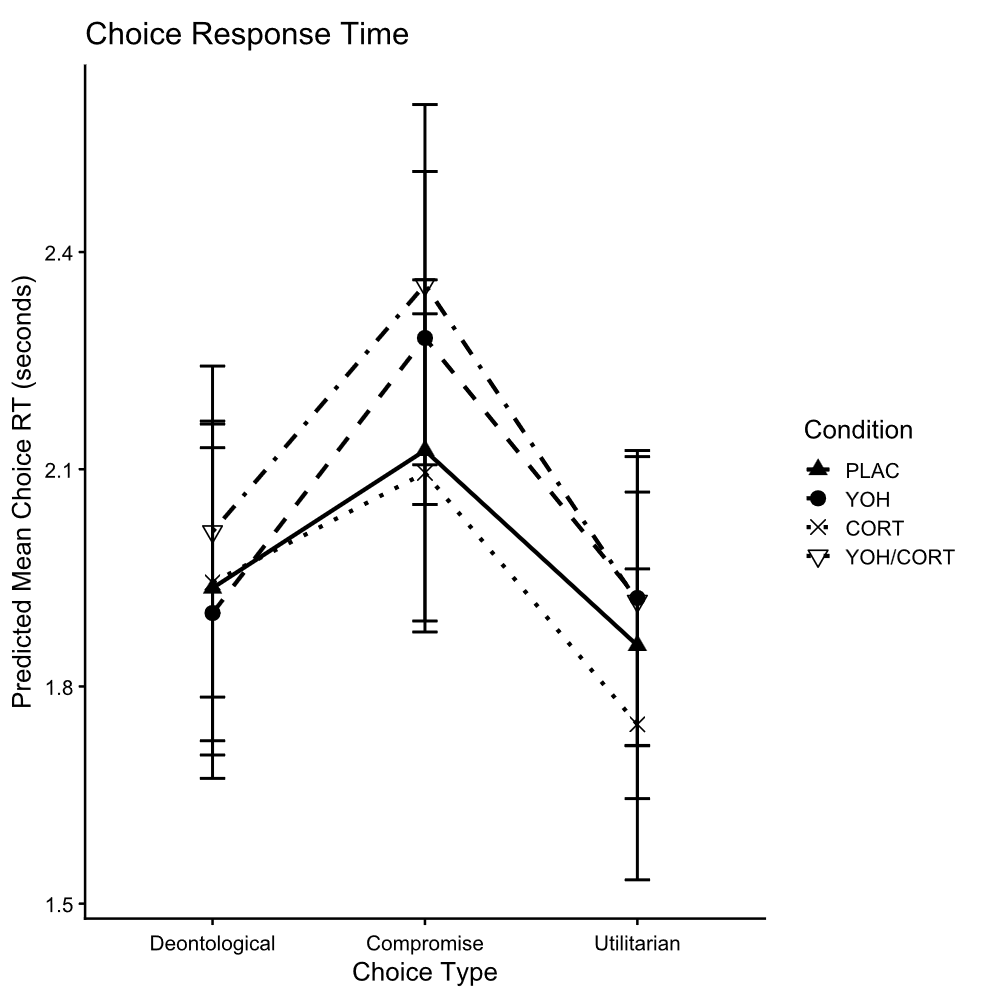


| **Table S23.** Model estimates of a linear mixed model of choice response time in relation to the number of choice options. Outcome was log transformed. Estimation was done with REML. Final model included 100 participants. | | | | |
| --- | --- | --- | --- | --- |
| **Fixed effects** | **Estimate (SE)** | **df** | **t** | **p** |
| Intercept | 2.135 (0.124) | 101 | 17.260 | **0.000***** |
| YOH | 0.035 (0.135) | 101 | 0.259 | 0.797 |
| CORT | 0.004 (0.135) | 101 | 0.026 | 0.979 |
| Options | 0.124 (0.022) | 97 | 5.623 | **0.000***** |
| ΔEducation med-low | -0.263 (0.123) | 93 | -2.133 | **0.036*** |
| ΔEducation med-high | 0.316 (0.120) | 93 | -2.644 | **0.010**** |
| Age | 0.000 (0.005) | 93 | 0.030 | 0.976 |
| YOH * CORT | 0.026 (0.184) | 93 | 0.144 | 0.886 |
| YOH * Options | 0.012 (0.025) | 97 | 0.490 | 0.625 |
| CORT * Options | -0.005 (0.025) | 97 | -0.208 | 0.836 |
| **Random effects** | **Variance (SD)** | **r** |  |  |
| Intercept participant | 0.222 (0.471) | - |  |  |
| Slope options | 0.009 (0.093) | 0.56 |  |  |
| Residual | 0.334 (0.578) | - |  |  |
| *: p-value <.05 | | | | |
| **: p-value <.01 | | | | |
| ***: p-value <.001 | | | | |


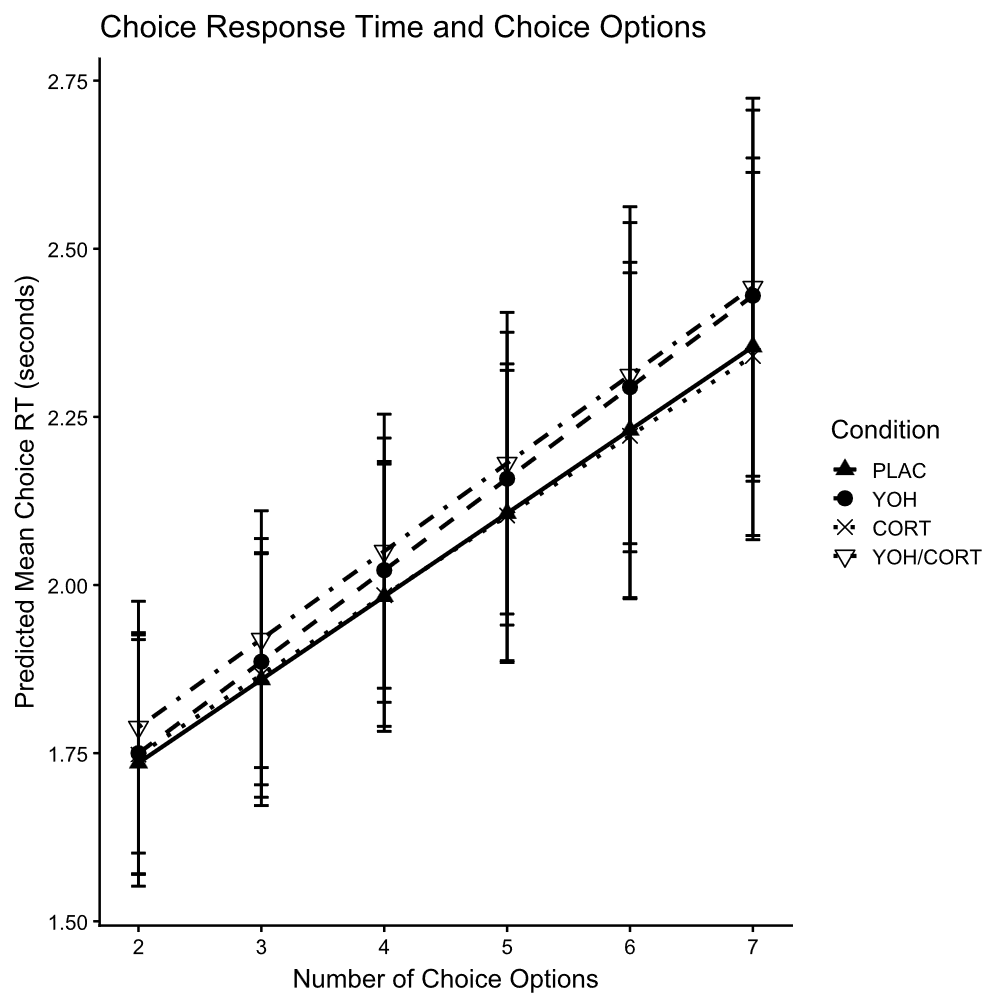

Supplement: Supplementary file 1 [file 7038e37357c3cb7d7f1ecd1d.docx]
